# Supplementary material
Source: PubMed Central journal article supplement (PMC4496282)
Supplement: NIHMS686747-supplement-1.pdf [file NIHMS686747-supplement-1.pdf]

**Supplementary data accompanying:**

**Urocortin3 mediates somatostatin-dependent negative feedback control of insulin secretion**

Talitha van der Meulen<sup>1,2</sup>, Cynthia J. Donaldson<sup>2</sup>, Elena Cáceres<sup>2</sup>, Anna E. Hunter<sup>1,2</sup>,  
Christopher Cowing-Zitron<sup>1</sup>, Lynley D. Pound<sup>3</sup>, Michael W. Adams<sup>4</sup>, Andreas  
Zembrzycki<sup>5</sup>, Kevin L. Grove<sup>3</sup>, Mark O. Huising<sup>1,2,6\*</sup>

<sup>1</sup>Department of Neurobiology, Physiology & Behavior, College of Biological Sciences,  
University of California, Davis, CA, USA.

<sup>2</sup>Clayton Foundation Laboratories for Peptide Biology, The Salk Institute for Biological  
Studies, La Jolla, CA, USA.

<sup>3</sup>Division of Diabetes, Obesity and Metabolism, Oregon National Primate Research  
Center, Oregon Health and Science University, Beaverton, OR, USA.

<sup>4</sup>Waitt Advanced Biophotonics Center, The Salk Institute for Biological Studies, La Jolla,  
CA, USA.

<sup>5</sup>Molecular Neurobiology Laboratory, The Salk Institute for Biological Studies, La Jolla,  
CA, USA.

<sup>6</sup>Department of Physiology & Membrane Biology, School of Medicine, University of  
California, Davis CA, USA.

\* address all correspondence to [mhuising@ucdavis.edu](mailto:mhuising@ucdavis.edu) or 1-530-752-4670

Supplementary Figure 1

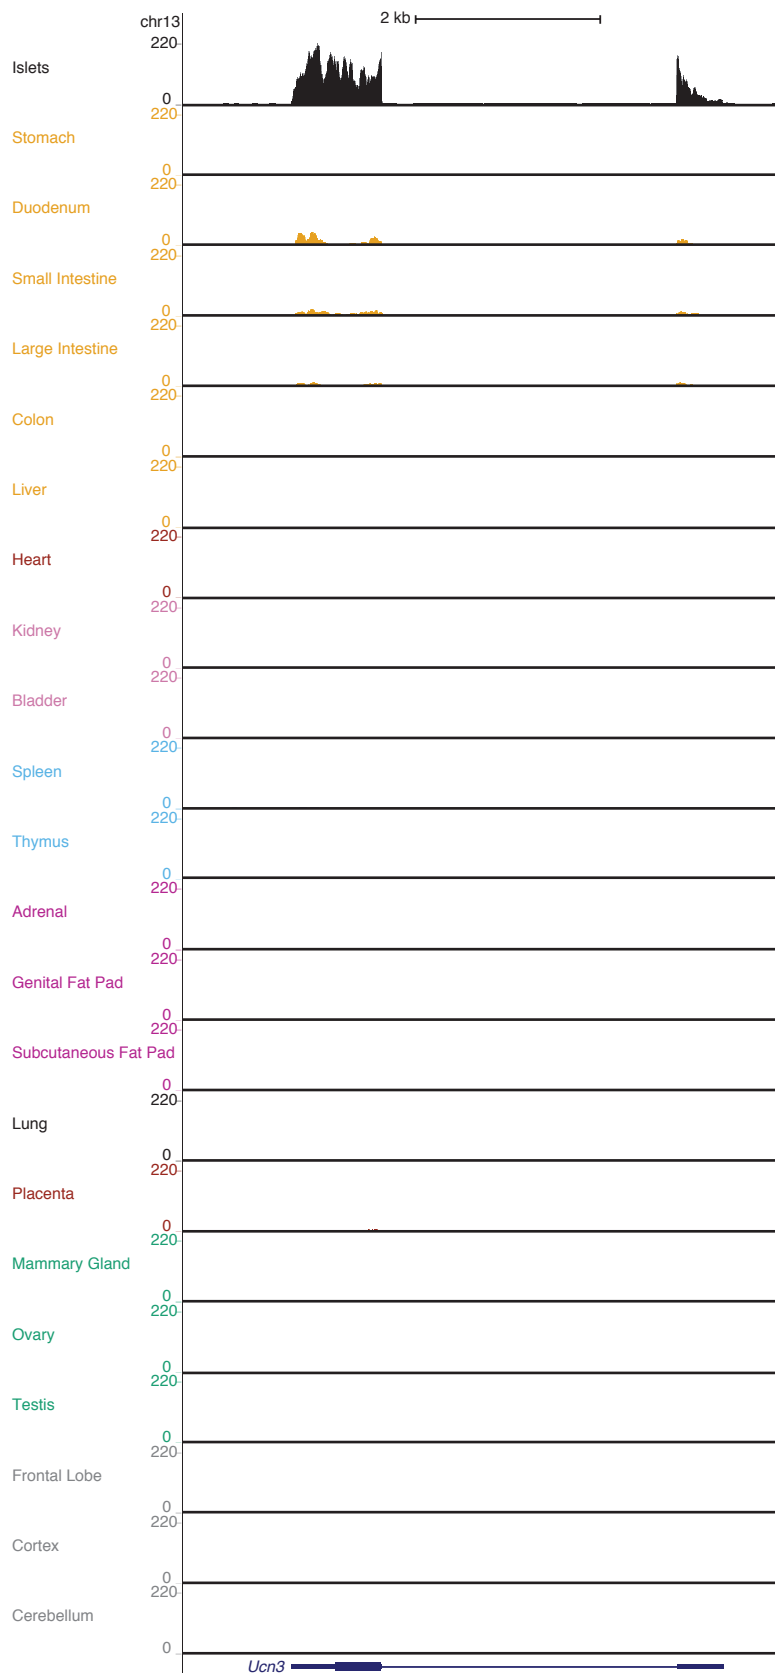

**Supplementary Figure 1** Ucn3 expression in islets compared to a range of tissues. Ucn3 expression is markedly more abundant in islets compared to any other tissue, with expression in most other tissues undetectable. Islet data obtained from wild type islets (**Fig. 2**); all other data obtained from the Encode project<sup>55</sup> (Geo: GSE30567). All data are normalized to  $1 \times 10^7$  reads.

Supplementary Figure 2

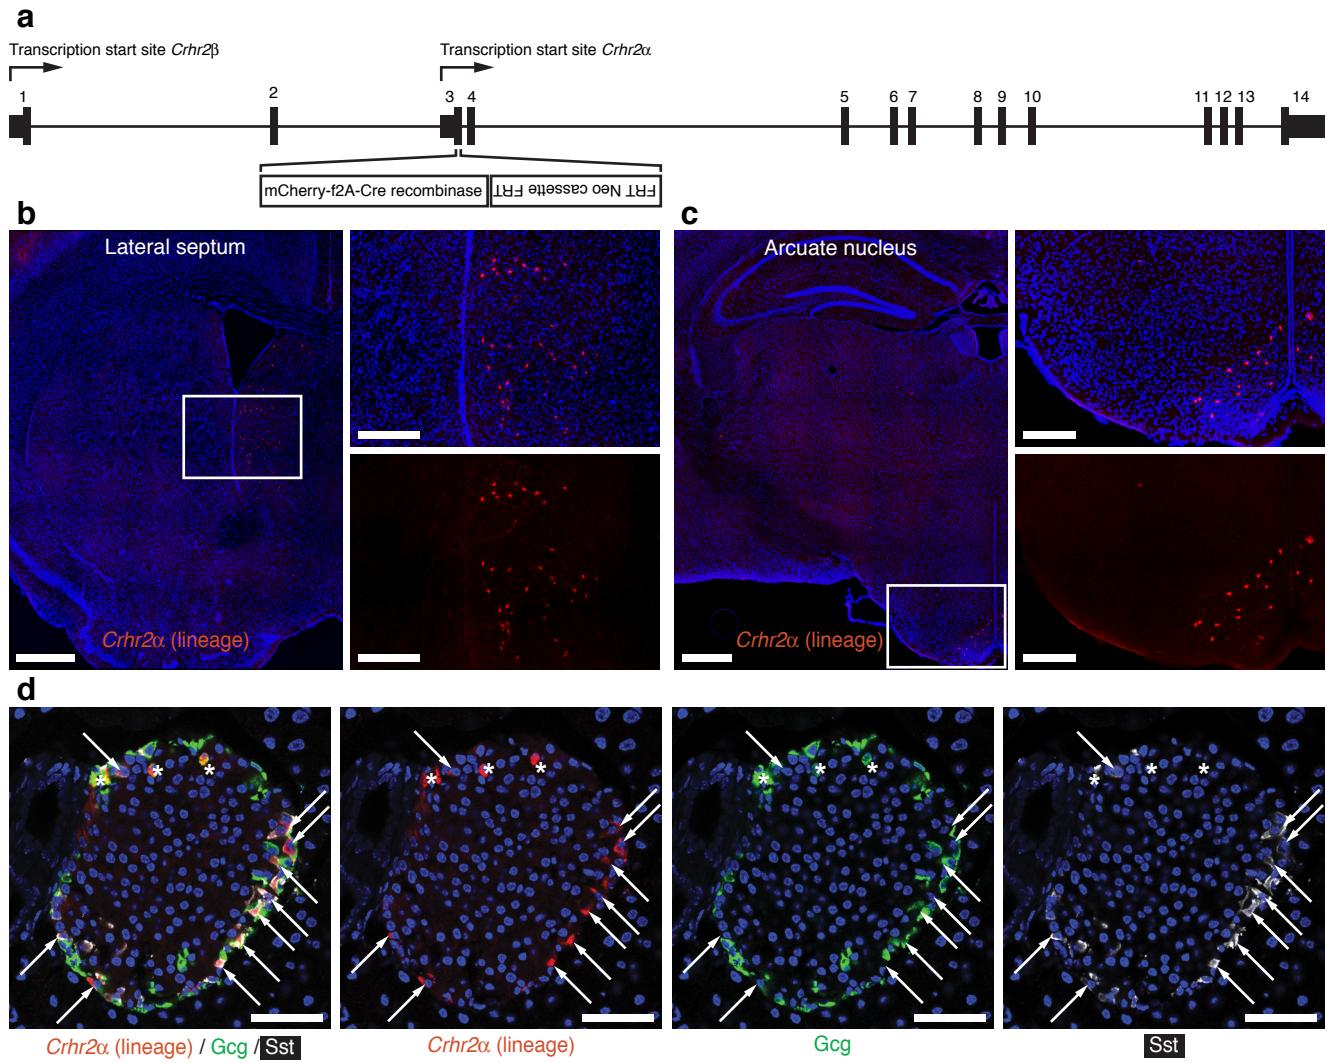



**Supplementary Figure 2** Generation of a BAC–transgenic *Crhr2 $\alpha$*  reporter. **(a)** A 140 kb BAC clone was manipulated by homologous recombination to replace the start codon of the alpha isoform of the *Crhr2* gene in exon 3, which is skipped in the beta isoform of *Crhr2*, with a reporter cassette containing mCherry fused to Cre recombinase by a constitutively proteolytic f2A processing site. A neomycin selection marker, flanked by FRT sites was used for positive selection and was later removed by crossing our founder to an actin FLP1 mouse. While mCherry was silent, this mouse crossed to an appropriate floxed reporter mouse (here tdTomato or LacZ) enables the visualization of *Crhr2 $\alpha$*  lineage expression at established expression sites in the brain such as the lateral septum **(b)** and the arcuate nucleus **(c)**. **(d)** The same *Crhr2 $\alpha$*  reporter line demonstrates lineage expression of *Crhr2 $\alpha$*  on delta (arrows) and alpha (asterisks), but not beta cells. Scale bars indicate 500  $\mu\text{m}$  in overviews and 200  $\mu\text{m}$  in details **(b,c)** and 50  $\mu\text{m}$  **(d)**.

Supplementary Figure 3

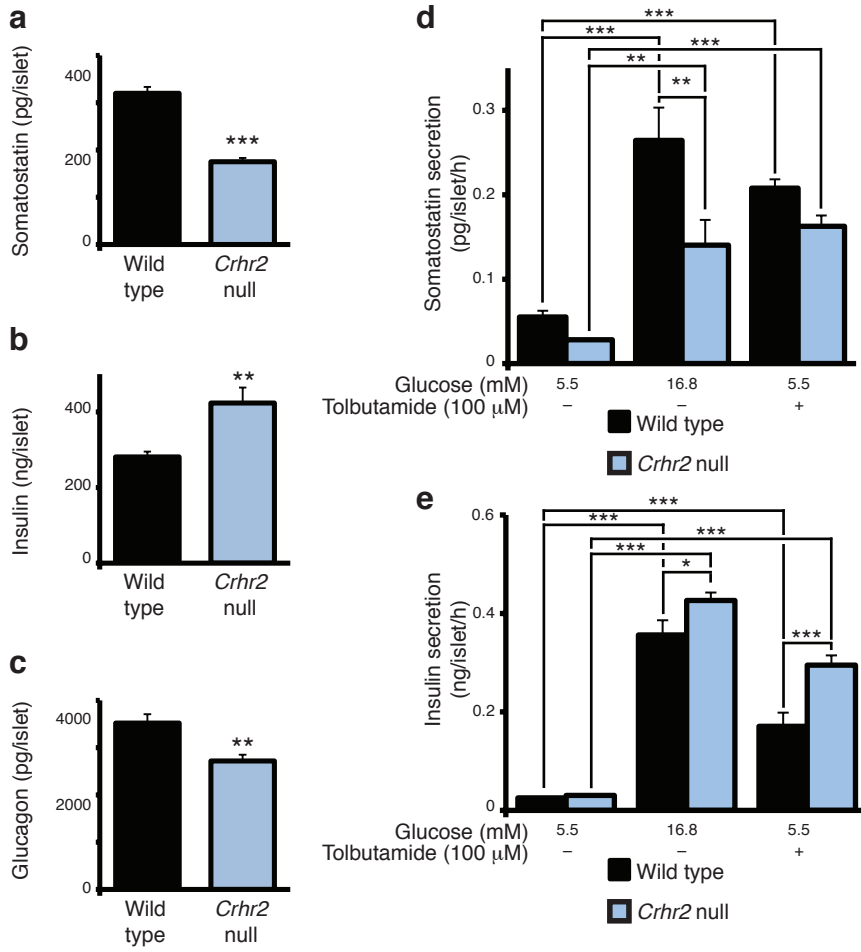

**Supplementary Figure 3** *Crhr2* null islets are delta cell-deficient and demonstrate impaired somatostatin secretion. *Crhr2* null islets demonstrate reduced somatostatin content (**a**), increased insulin content (**b**) and reduced glucagon content (**c**) ( $n = 12$ ). (**d**) *Crhr2* null islets are deficient in somatostatin secretion and display modest impairment of somatostatin release in response to tolbutamide ( $n = 4, 50$  or  $100$  islets/well). (**e**) Conversely, the lack of *Crhr2* is associated with increased tolbutamide-stimulated insulin secretion ( $n = 4$ ). Significance determined by Student's t-test (**a,b,c**) or two-way ANOVA for treatment and genotype, followed by Holm-Sidak's multiple comparison test (**d,e**, asterisks indicate significance with the 5.5 mM glucose group for the same genotype, unless indicated otherwise). All values are mean  $\pm$  s.e.m., \* $P < 0.05$ , \*\* $P < 0.01$ , \*\*\* $P < 0.001$ .

Supplementary figure 4

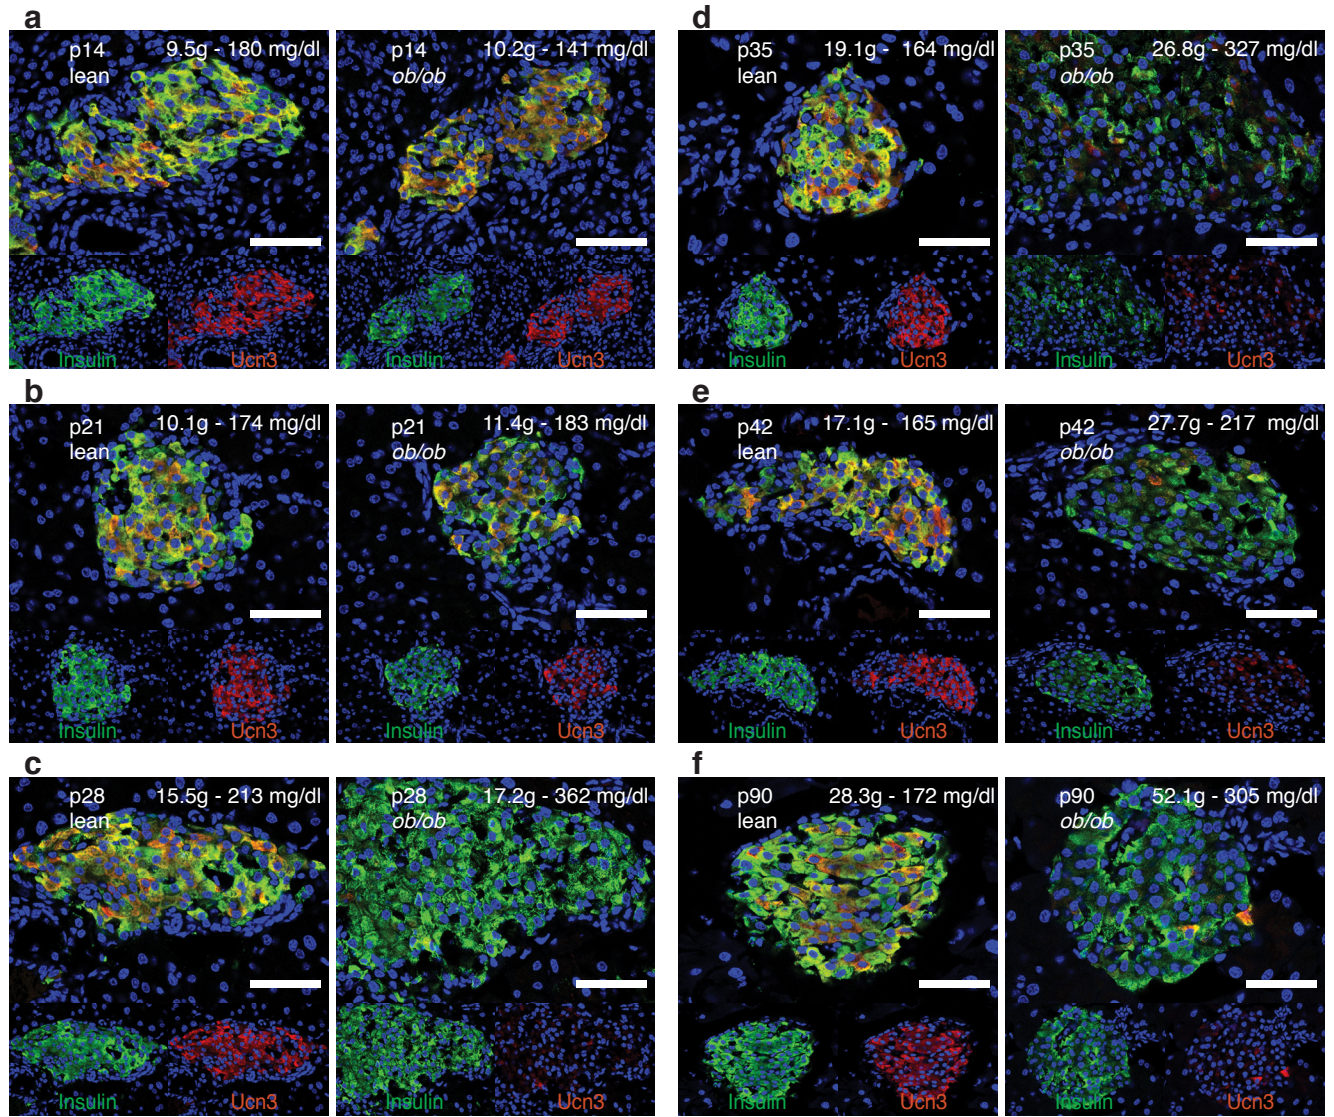

**Supplementary Figure 4** The disappearance of Ucn3 expression coincides with the onset of obesity and diabetes in *ob/ob* mice. Ucn3 expression in beta cells is comparable between lean and *ob/ob* animals at p14 (**a**) and p21 (**b**), but disappears from beta cells of *ob/ob* mice around p28 (**c**), coincident with the onset of hyperglycemia. Ucn3 expression remains markedly reduced in *ob/ob* mice at p35 (**d**), p42 (**e**) and p90 (**f**), although residual Ucn3 immunoreactivity is occasionally detected. Scale bars indicate 50  $\mu\text{m}$ .

Supplementary Figure 5

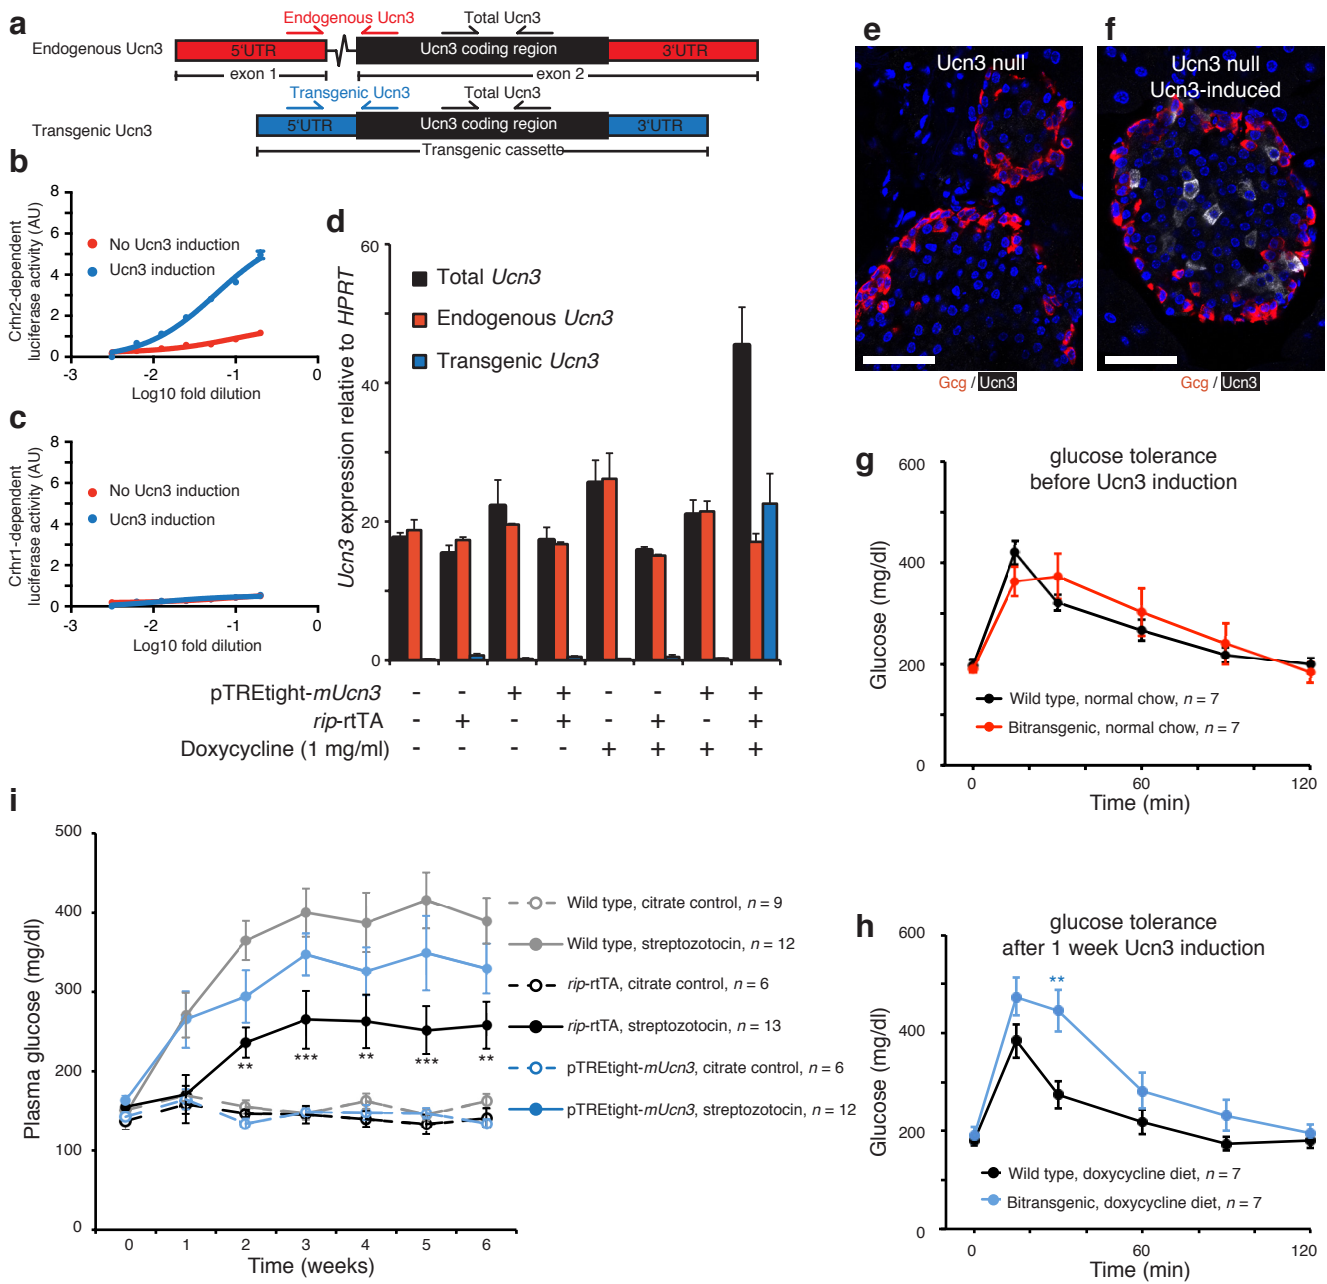

**Supplementary Figure 5** Development of a beta cell-specific doxycycline inducible Ucn3 transgenic model. (a) Schematic of the strategy used to develop and validate a beta cell-specific doxycycline inducible Ucn3 transgenic model. (b,c) Conditioned media from doxycycline-stimulated rat Ins1 insulinoma cells transfected with the pTREtight-*mUcn3* doxycycline-inducible transgenic vector and a helper vector encoding reverse tetracycline transactivator protein (rtTA) selectively stimulated Crhr2 as measured by cAMP response element-dependent luciferase activity in HEK293T cells<sup>56</sup>. Conditioned media from non-induced Ins1 cells has residual activity on Crhr2, likely attributable to endogenous rat Ucn3 that is secreted by Ins1 cells. (d) A pTREtight-*mUcn3* transgenic mouse supported robust expression of transgenic *Ucn3* *in vivo*, when crossed to mice that express the reverse tetracycline transactivator protein under control of the rat insulin promoter (*rip*-rtTA) and received doxycycline. (e,f) Backcrossing of pTREtight-*mUcn3* x *rip*-rtTA bitransgenic animals on a *Ucn3* null background reveals that the doxycycline-mediated induction of Ucn3 is mosaic and restricted to a relatively small subset of beta cells. Bitransgenic animals, when naive to doxycycline, show normal intra-peritoneal glucose tolerance (g), but after one week of doxycycline exposure develop glucose intolerance (h) ( $n = 7$ ). The *rip*-rtTA, but not pTREtight-*mUcn3* single transgenic animals are protected from STZ-induced diabetes (i) ( $n$  for each treatment indicated in panel, asterisks reflect significant differences with wild type STZ-treated animals). AU = arbitrary units. Significance determined by two-way ANOVA for treatment and its interaction with time, followed by Holm-Sidak's multiple comparison test (g,h). Scale bars indicate 50  $\mu\text{m}$ . All values are mean  $\pm$  s.e.m. across technical replicates (b-d) or biological replicates (g-i), \* $P < 0.05$ , \*\* $P < 0.01$ , \*\*\* $P < 0.001$ .

Supplementary figure 6

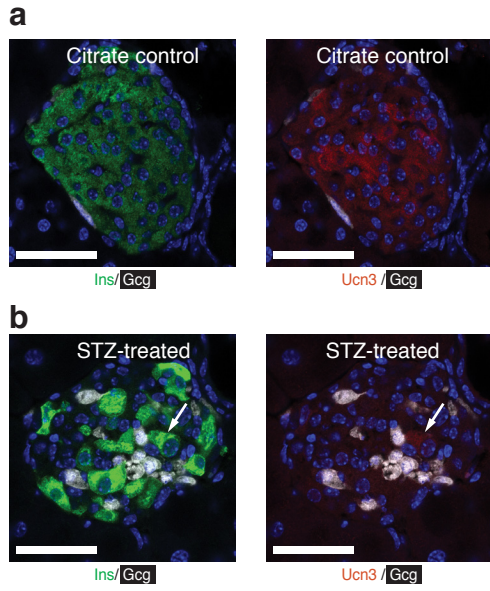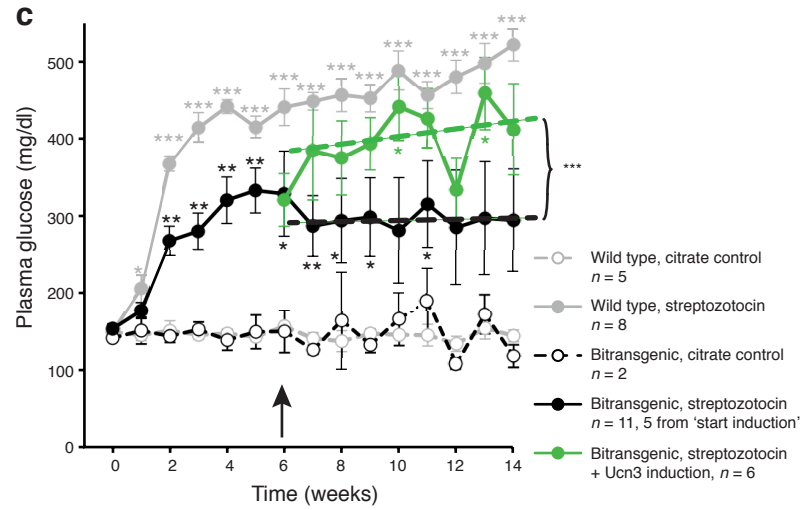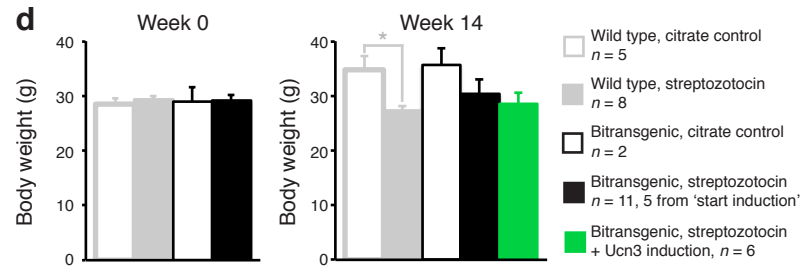



**Supplementary Figure 6** Ucn3 aggravates hyperglycemia in STZ-induced diabetes. (a,b) Diabetes induced by the multiple low-dose STZ model led to the loss of Ucn3 expression in residual beta cells (arrow indicates a single Ucn3+ beta cell). (c) Doxycycline-inducible expression of Ucn3 specifically in beta cells after the onset of moderate but stable STZ-induced hyperglycemia aggravated diabetes and markedly increased plasma glucose levels compared to bitransgenic animals without doxycycline to levels indistinguishable from STZ-treated wild-type animals (*n* for each treatment indicated in panel). Body weights for each cohort prior to STZ administration (d) and at the conclusion of the experiment (e). All asterisks reflect significant differences with wild type citrate controls, except green asterisks that reflect significance between bitransgenic, STZ-treated groups with or without Ucn3 induction. Scale bars indicate 50  $\mu$ m. Significance determined by linear regression between non-induced and induced bitransgenics following induction (c) and by Student's t-test to compare individual time points. Significance of body weights (d,e) was determined by one-way ANOVA followed by Student's t-test with Welch's correction as necessary. All values are mean  $\pm$  s.e.m., \**P* < 0.05, \*\**P* < 0.01, \*\*\**P* < 0.001.



Supplementary figure 7

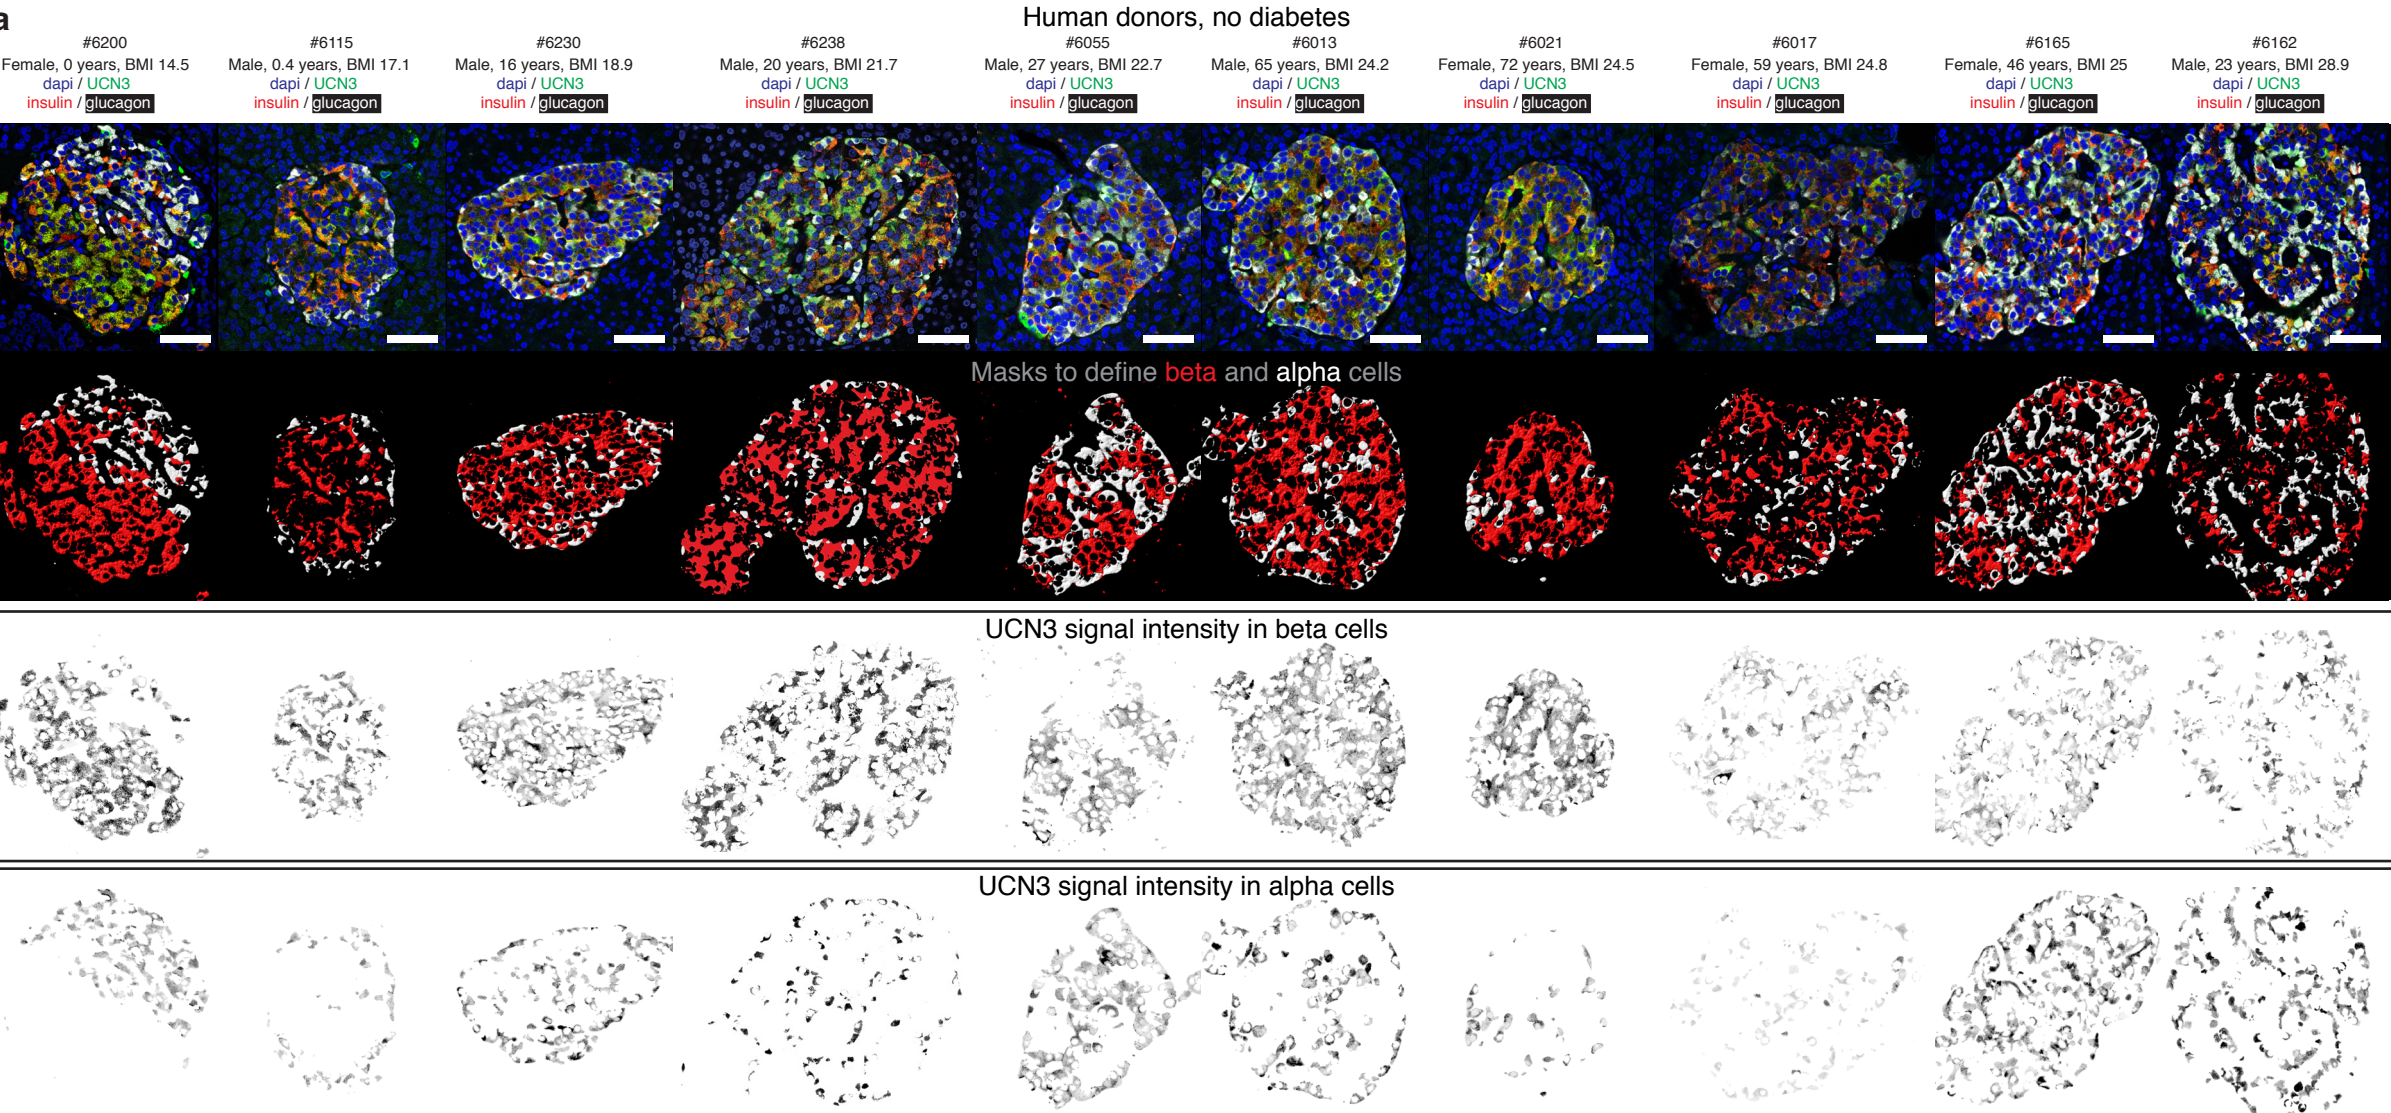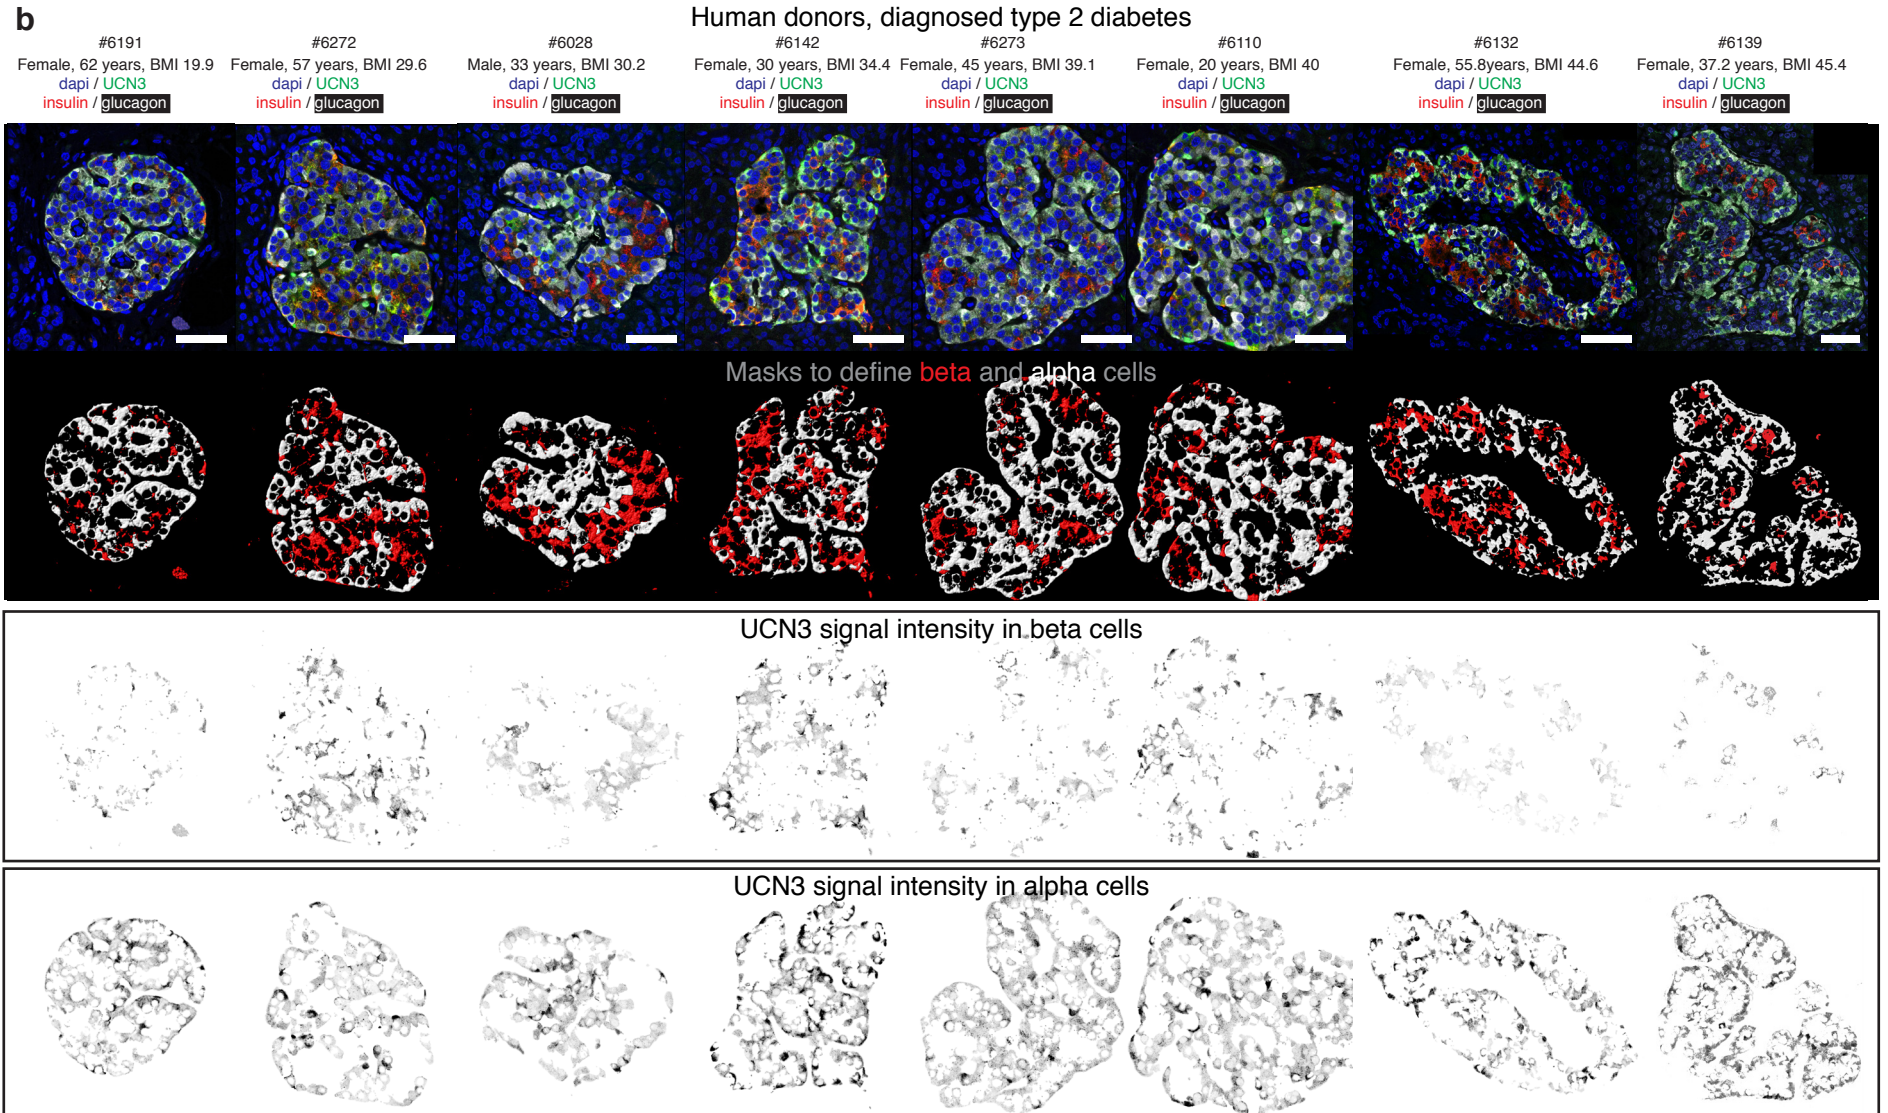



**Supplementary Figure 7** UCN3 expression is lost in beta cells of human donors with diagnosed type 2 diabetes. **(a)** UCN3 is expressed at approximately equal levels in both alpha and beta cells in a cohort of ten non-diabetic pancreas donors. **(b)** Beta cells from a cohort of eight type 2 diabetic donors across a range of BMIs displayed varying degrees of depletion of Ucn3 from beta cells, while UCN3 expression in alpha cells remained. We applied masks based on insulin (red) and glucagon (white) to isolate UCN3 staining in beta and alpha cells. Donor nPOD ID numbers (#) are provided for each donor, along with pertinent donor information. Scale bars indicate 50  $\mu\text{m}$ .

**a**

Macaque, control diet

#28109 1 year, control  
dapi / UCN3  
insulin / glucagon

#28146 1 year, control  
dapi / UCN3  
insulin / glucagon

#22459 9.3 years, control  
dapi / UCN3  
insulin / glucagon

#21032 11.3 years, control  
dapi / UCN3  
insulin / glucagon

#19836 12.8 years, control  
dapi / UCN3  
insulin / glucagon

#19843 12.8 years, control  
dapi / UCN3  
insulin / glucagon

#23527 12.8 years, control  
dapi / UCN3  
insulin / glucagon

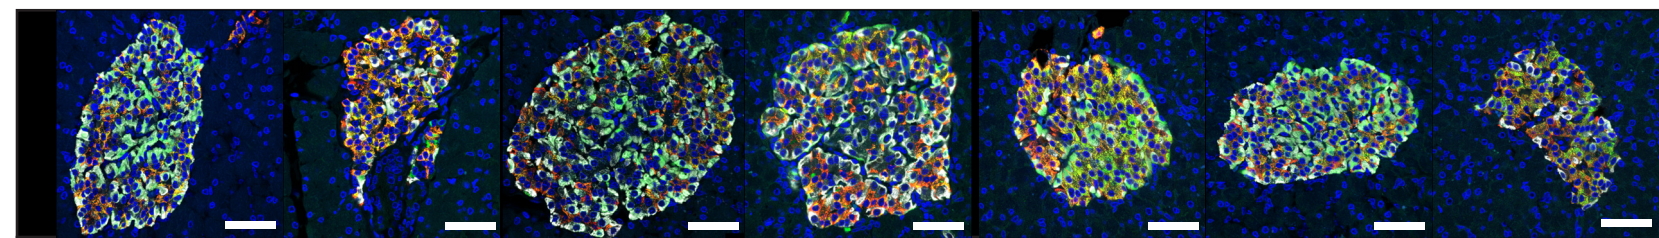

Masks to define beta and alpha cells

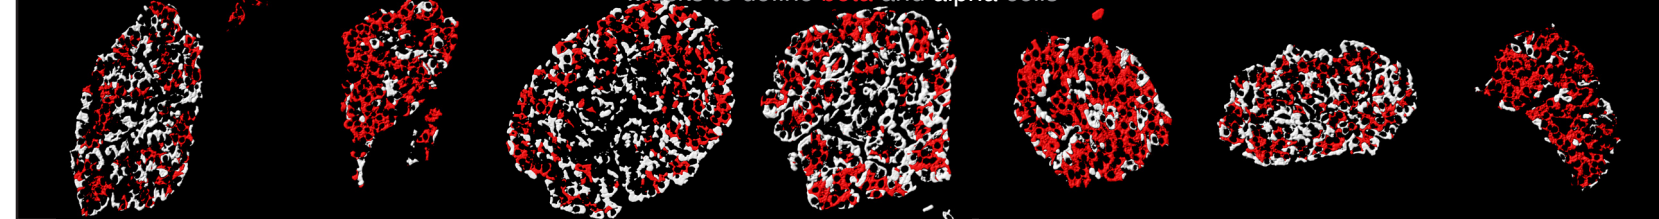

UCN3 signal intensity in beta cells

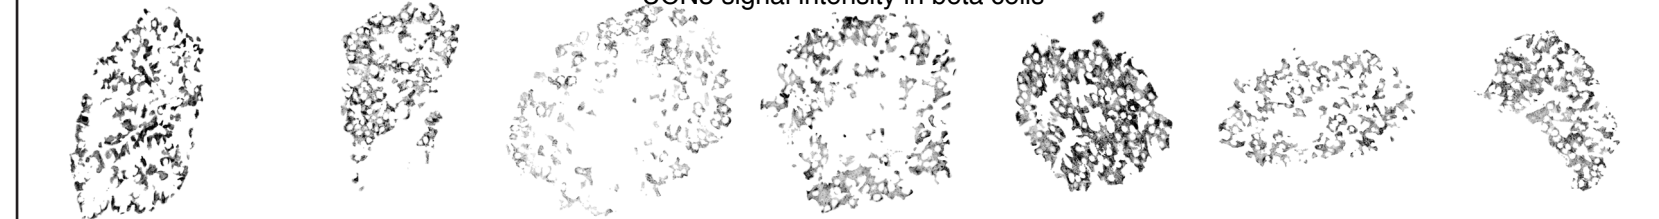

UCN3 signal intensity in alpha cells

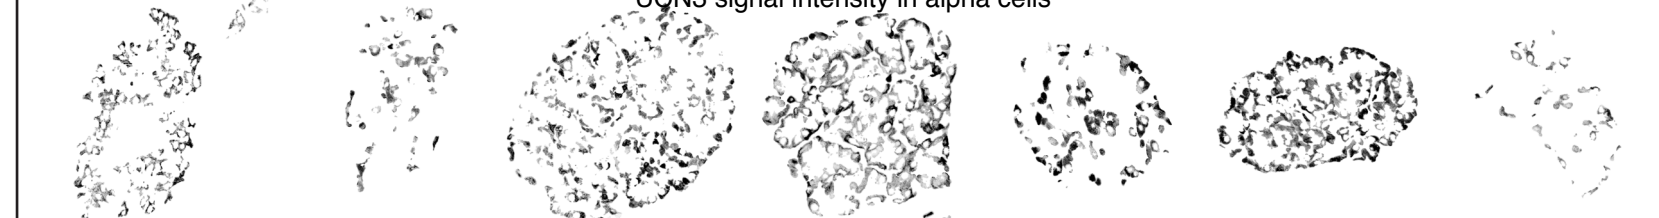**b**

Macaque, high fat diet-resistant

#24481 6.5 years, insulin-sensitive  
dapi / UCN3  
insulin / glucagon

#23299 7.9 years, insulin-sensitive  
dapi / UCN3  
insulin / glucagon

#21074 10.9 years, insulin-sensitive  
dapi / UCN3  
insulin / glucagon

#20282 11.7 years, insulin-sensitive  
dapi / UCN3  
insulin / glucagon

#20280 11.8 years, insulin-sensitive  
dapi / UCN3  
insulin / glucagon

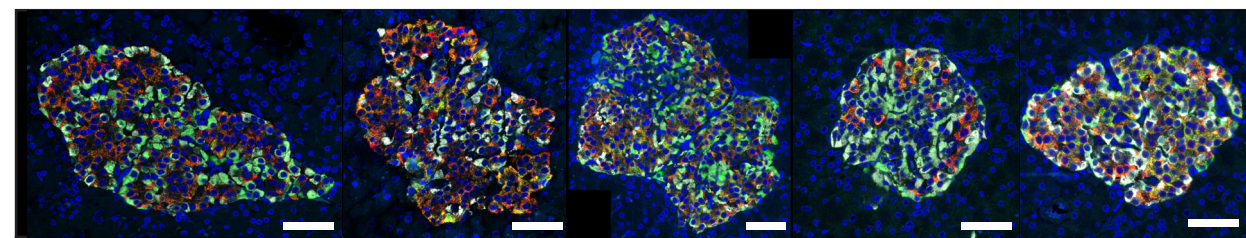

Masks to define beta and alpha cells

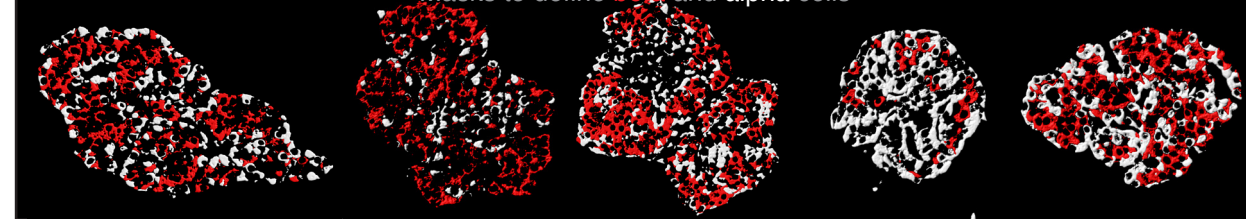

UCN3 signal intensity in beta cells

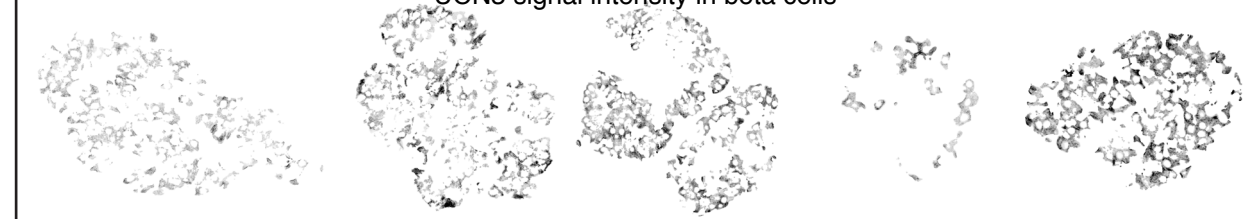

UCN3 signal intensity in alpha cells

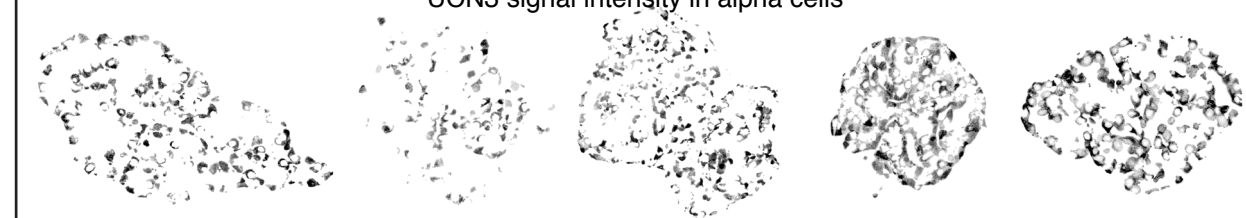**c**

Macaque, high fat diet-sensitive

#21937 14.0 years, insulin-resistant  
dapi / UCN3  
insulin / glucagon

#21969 9.8 years, insulin-resistant  
dapi / UCN3  
insulin / glucagon

#21125 11.3 years, insulin-resistant  
dapi / UCN3  
insulin / glucagon

#20169 11.7 years, insulin-resistant  
dapi / UCN3  
insulin / glucagon

#19267 13.6 years, insulin-resistant  
dapi / UCN3  
insulin / glucagon

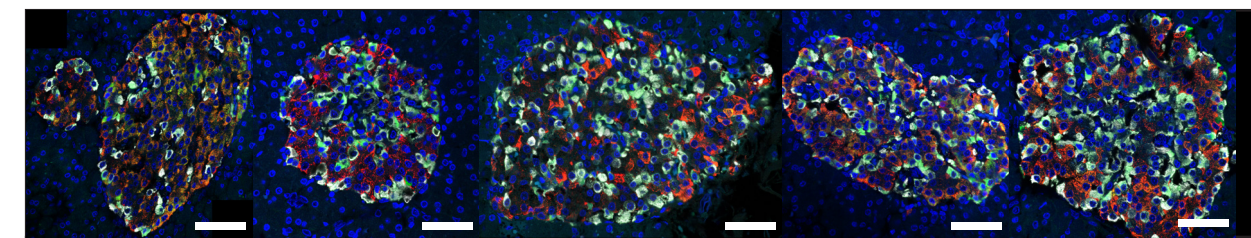

Masks to define beta and alpha cells

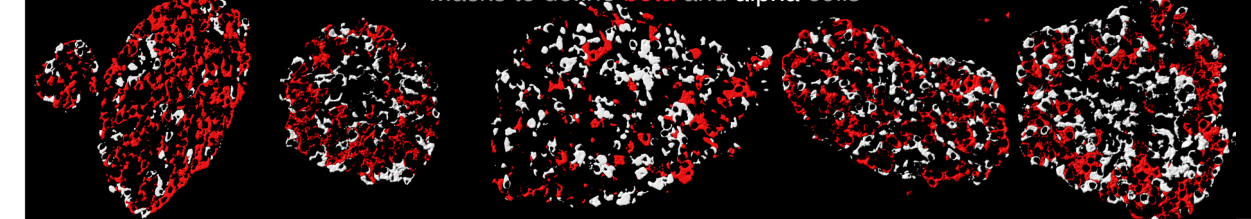

UCN3 signal intensity in beta cells

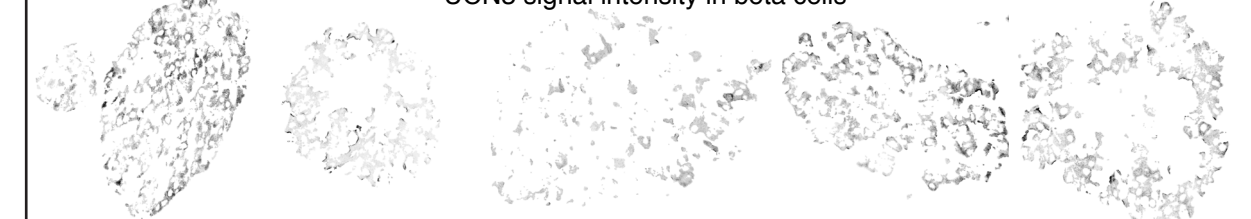

UCN3 signal intensity in alpha cells

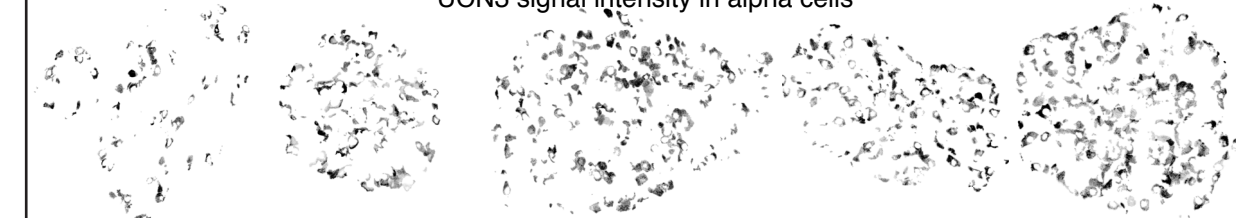

**Supplementary Figure 8** UCN3 expression is lost in beta cells of pre-diabetic macaques on high-fat diet. **(a)** Islets from control macaques demonstrate intense UCN3 immunoreactivity in both beta and alpha cells. **(b)** Macaques on a high-fat diet classified as 'diet-resistant' demonstrated a varying degree of loss in UCN3 in beta cells, while alpha cell UCN3 expression persisted. **(c)** Macaques classified as 'diet-sensitive', for their development of insulin resistance, increased body weight and dyslipidemia (**Supplementary Table 3**), demonstrated marked and selective depletion of Ucn3 in their beta cells. Macaque ID numbers (#) are provided for each animal. Scale bars indicate 50  $\mu\text{m}$ .



**Supplementary Table 1: Top 20 most significantly altered genes in Ucn3 null islets compared to wild type islets**

*van der Meulen et al.*

| RefSeq ID    | Symbol      | normalized mean expression<br>in wild type islets | normalized mean expression<br>in Ucn3 null islets | fold depletion<br>in Ucn3 null islets | adjusted p-value |
|--------------|-------------|---------------------------------------------------|---------------------------------------------------|---------------------------------------|------------------|
| NM_031250    | Ucn3        | 10356.37                                          | 119.96*                                           | 86.33                                 | 9.01E-187        |
| NR_028405    | Marcks1-ps4 | 178.03                                            | 24.37                                             | 7.31                                  | 1.20E-20         |
| NM_001033879 | Tubal3      | 1.05                                              | 47.16                                             | 0.02                                  | 1.62E-10         |
| NM_001252620 | Spock3      | 278.53                                            | 111.28                                            | 2.50                                  | 4.64E-08         |
| NM_008245    | Hhex        | 679.60                                            | 360.82                                            | 1.88                                  | 2.72E-07         |
| NM_007914    | Ehf         | 1203.57                                           | 675.04                                            | 1.78                                  | 1.94E-06         |
| NM_001081306 | Ptprz1      | 415.05                                            | 208.31                                            | 1.99                                  | 2.47E-06         |
| NM_001013785 | Akr1c19     | 1160.04                                           | 2308.71                                           | 0.50                                  | 7.13E-06         |
| NM_011255    | Rbp4        | 2924.10                                           | 1739.26                                           | 1.68                                  | 7.64E-06         |
| NM_134072    | Akr1c14     | 2001.13                                           | 1283.06                                           | 1.56                                  | 1.59E-05         |
| NM_009215    | Sst         | 56983.61                                          | 23838.63                                          | 2.39                                  | 4.73E-05         |
| NM_007911    | Efnb3       | 434.82                                            | 243.28                                            | 1.79                                  | 1.61E-04         |
| NM_172800    | Sdk2        | 2078.29                                           | 3025.00                                           | 0.69                                  | 4.45E-04         |
| NM_001252293 | Mest        | 339.55                                            | 186.07                                            | 1.82                                  | 7.16E-04         |
| NM_146050    | Oit1        | 228.67                                            | 113.62                                            | 2.01                                  | 1.13E-03         |
| NM_001252292 | Mest        | 339.91                                            | 189.30                                            | 1.80                                  | 1.16E-03         |
| NM_009511    | Vipr2       | 26.33                                             | 86.11                                             | 0.31                                  | 2.60E-03         |
| NM_001163691 | Cacna1h     | 311.03                                            | 174.87                                            | 1.78                                  | 2.60E-03         |
| NM_001163584 | Prom1       | 2968.21                                           | 4882.28                                           | 0.61                                  | 3.88E-03         |
| NM_007976    | F5          | 187.72                                            | 96.51                                             | 1.95                                  | 8.70E-03         |

\* residual Ucn3 message is detected because the promoter and first (non-coding) exon of the Ucn3 gene were left intact in the Ucn3 null mouse and drive expression of a partial transcript.

**Supplementary Table 2: Statistical comparison of continuous glucose monitoring data**

*van der Meulen et al.*

**Differences in variance** (t-test for differences in mean\Brown Forsythe test for differences in variance)

**Plasma glucose (mg/dl)**

|         | mean   | st. dev. | sample size | ob/ob 1           | +/ob 1             | ob/ob 2           | +/ob 2            |                           |
|---------|--------|----------|-------------|-------------------|--------------------|-------------------|-------------------|---------------------------|
| ob/ob 1 | 737.13 | 125.10   | 852         |                   | <b>1.0597E-119</b> | 1.2984E-16        | <b>5.0888E-91</b> | } differences in variance |
| +/ob 1  | 146.61 | 33.47    | 848         | <b>7.1470E-04</b> |                    | <b>4.8361E-97</b> | 2.5224E-13        |                           |
| ob/ob 2 | 720.80 | 88.21    | 852         | 0.06048           | <b>6.1670E-07</b>  |                   | <b>6.5657E-59</b> |                           |
| +/ob 2  | 152.34 | 45.32    | 851         | <b>6.7803E-03</b> | 0.48231            | <b>5.5256E-06</b> |                   |                           |

} differences in mean plasma glucose

**Period length (minutes)**

|         | mean  | st. dev. | sample size | ob/ob 1 | +/ob 1         | ob/ob 2        | +/ob 2         |                                     |
|---------|-------|----------|-------------|---------|----------------|----------------|----------------|-------------------------------------|
| ob/ob 1 | 37.26 | 22.14    | 113         |         | <b>0.01913</b> | 0.20786        | <b>0.00554</b> | } differences in mean period length |
| +/ob 1  | 29.34 | 14.73    | 143         |         |                | <b>0.00006</b> | 0.50664        |                                     |
| ob/ob 2 | 43.16 | 23.27    | 98          |         |                |                | <b>0.00001</b> |                                     |
| +/ob 2  | 30.58 | 14.91    | 138         |         |                |                |                |                                     |

**Supplementary Table 3: macaque cohort metabolic information<sup>§</sup>***van der Meulen et al.*

|                                  | <b>control (average ± s.e.)</b> | <b>diet-resistant (average ± s.e.)</b> | <b>diet-sensitive (average ± s.e.)</b> |
|----------------------------------|---------------------------------|----------------------------------------|----------------------------------------|
| fasting glucose (mg/dl)          | 57.4 (± 1.81)                   | 70.6 (± 3.08) *                        | 64 (± 5.98)                            |
| fasting insulin (µg/ml)          | 20.67 (± 6.61)                  | 27.42 (± 5.75)                         | 357.9 (± 209.98)                       |
| AUC i.v. GTT glucose             | 10363 (± 431)                   | 10409 (± 513)                          | 13043 (± 614) **                       |
| AUC i.v. GTT insulin             | 6399 (± 1694)                   | 8216 (± 984)                           | 51778 (± 11394) ***                    |
| fat mass (kg)                    | 2.41 (± 0.47)                   | 4.38 (± 0.75)                          | 7.06 (± 0.67) ***                      |
| lean mass (kg)                   | 8.52 (± 0.34)                   | 9.70 (± 0.48)                          | 12.18 (± 0.49) ***                     |
| total body weight (kg)           | 11.18 (± 0.59)                  | 14.36 (± 1.15)                         | 19.54 (± 0.96) ***                     |
| percent body fat                 | 21.0 (± 3.29)                   | 29.7 (± 3.10)                          | 35.9 (± 1.97) **                       |
| percent trunk fat                | 25.1 (± 4.91)                   | 36.8 (± 3.81) *                        | 44.0 (± 1.95) **                       |
| plasma triglycerides (mg/dl)     | 49.8 (± 4.21)                   | 82.0 (± 18.59)                         | 261.8 (± 35.25) ***                    |
| total plasma cholesterol (mg/dl) | 125.0 (± 20.64)                 | 190.0 (± 8.60) *                       | 218.2 (± 19.46) **                     |
| plasma VLDL (mg/dl)              | 10.0 (± 0.84)                   | 16.4 (± 3.72)                          | 52.4 (± 7.05) ***                      |
| plasma LDL (mg/dl)               | 47.5 (± 9.15)                   | 54.0 (± 4.68)                          | 75.2 (± 9.89) *                        |
| plasma HDL (mg/dl)               | 66.5 (± 15.20)                  | 119.2 (± 9.72) *                       | 90.6 (± 15.29)                         |

<sup>§</sup> data from Nygaard et al., International Journal of Obesity 2014.

\* p &lt; 0.05, \*\* p &lt; 0.01, \*\*\* p &lt; 0.001, compared to control.



**Supplementary Table 4: mouse body weight information***van der Meulen et al.*

| <b>Corresponding figure</b> | <b>group</b>                     | <b>weight (mean <math>\pm</math> s.e.m.)</b> |
|-----------------------------|----------------------------------|----------------------------------------------|
| Figure 3g                   | saline control                   | 29.4 ( $\pm$ 1.10)                           |
|                             | Ucn3                             | 30.0 ( $\pm$ 0.98)                           |
|                             | Ast2b                            | 30.1 ( $\pm$ 1.35)                           |
| Figure 3i                   | saline control                   | 27.9 ( $\pm$ 1.15)                           |
|                             | Ucn3                             | 29.9 ( $\pm$ 1.24)                           |
|                             | Sst ant.                         | 29.1 ( $\pm$ 0.80)                           |
|                             | Ucn3 + Sst ant.                  | 28.2 ( $\pm$ 1.31)                           |
| Supplementary figure 5g     | wild type, normal chow           | 27.1 ( $\pm$ 0.79)                           |
|                             | bitransgenic, normal chow        | 27.7 ( $\pm$ 1.15)                           |
| Supplementary figure 5h     | wild type, doxycycline diet      | 27.7 ( $\pm$ 0.45)                           |
|                             | bitransgenic, doxycycline diet   | 26.6 ( $\pm$ 0.77)                           |
| Supplementary figure 5i     | wild type, citrate control       | 29.3 ( $\pm$ 0.90)                           |
|                             | wild type, STZ                   | 29.4 ( $\pm$ 0.80)                           |
|                             | rip-rtTA, citrate control        | 31.6 ( $\pm$ 1.39)                           |
|                             | rip-rtTA, STZ                    | 30.3 ( $\pm$ 0.87)                           |
|                             | pTRETight-mUcn3, citrate control | 28.6 ( $\pm$ 0.82)                           |
|                             | pTRETight-mUcn3, STZ             | 29.9 ( $\pm$ 1.13)                           |

**Supplementary Table 5: qPCR primer information***van der Meulen et al.*

| RefSeq ID | Gene  | primer                         | sequence 5' → 3'                               | amplicon size (bp) |
|-----------|-------|--------------------------------|------------------------------------------------|--------------------|
| NM_008100 | Gcg   | qrodGcg.fwu1<br>qrodGcg.rvu1   | TCACAGGGCACATTCACCAG<br>CATCATGACGTTTGGCAATGTT | 121                |
| NM_001185 | Ins2  | qrodIns2.fwu1<br>qrodIns2.rvu1 | GCTCTCTACCTGGTGTGTGGG<br>CAAGGTCTGAAGGTCACCTGC | 128                |
| NM_031250 | Ucn3  | qmUcn 3.fwu1<br>qmUcn 3.rvu1   | GCTGTGCCCTCGACCT<br>TGGGCATCAGCATCGCT          | 71                 |
| NM_021332 | Glp1r | qmGLP-1R.fwu1<br>qmGLP-1R.rvu1 | CCCTGGGCCAGTAGTGTG<br>GCAGGCTGGAGTTGTCCTTA     | 88                 |
| NM_009215 | Sst   | qrodSst.fwu1<br>qrodSst.rvu1   | GACCCAGACTCCGTCAGTTT<br>TCTCTGTCTGGTTGGGCTCG   | 112                |
| NM_001159 | Rbp4  | qmRbp4.fwu1<br>qmRbp4.rvu1     | AGACACGGAGGCTGGTGA<br>AGGGCCTGCTTTGACAGTAA     | 96                 |
| NM_008245 | Hhex  | qmHhex.fwu1<br>qmHhex.rvu1     | CTACACGCACGCCCTACTC<br>CAGAGGTCGCTGGAGGAA      | 76                 |
| NM_009953 | Crhr2 | qmCRFR2.fwu1<br>qmCRFR2.rvu1   | AAGTGCACGAGGGCAATG<br>TGGTGACCACAAAATAGTTGAAG  | 69                 |
| NM_013556 | Hprt  | qmHPRT.fwu<br>qmHPRT.rvu       | TCCTCCTCAGACCGCTTTT<br>CCTGGTTCATCATCGCTAATC   | 90                 |
